# Supplementary material for: Proteomics Unravels the Regulatory Mechanisms in Human Tears Following Acute Renouncement of Contact Lens Use: A Comparison between Hard and Soft Lenses
Source: PubMed Central journal article supplement (PMC6070515; doi:10.1038/s41598-018-30032-5), 2018-08-01
Supplement: 41598_2018_30032_MOESM1_ESM.pdf [file 41598_2018_30032_MOESM1_ESM.pdf]

## SUPPLEMENTARY INFORMATION

### **Proteomics Unravels the Regulatory Mechanisms in Human Tears Following Acute Renouncement of Contact Lens Use: A Comparison between Hard and Soft Lenses**

Caroline Manicam<sup>§\*</sup>, Natarajan Perumal<sup>§</sup>, Joanna Wasielica-Poslednik, Yong Cajetan

Ngongkole, Alexandra Tschäbunin, Marcel Sievers, Walter Lisch, Norbert Pfeiffer, Franz H. Grus and Adrian Gericke

Department of Ophthalmology, University Medical Centre of the Johannes Gutenberg University Mainz, 55131 Mainz, Germany.

<sup>§</sup> Both authors contributed equally to this work

#### **\*Corresponding author:**

Dr. Caroline Manicam

Department of Ophthalmology,

University Medical Centre of the Johannes Gutenberg

University Mainz,

Langenbeckstr. 1,

55131 Mainz, Germany.

E-mail: cmjc\_82@yahoo.com

Tel: +49 6131 17 8276

ORCID, Caroline Manicam: 0000-0001-5891-1155

ORCID, Natarajan Perumal: 0000-0002-2612-5907

Table S1 MaxQuant Parameters

| MaxQuant Parameter                               | Value                                                     |
|--------------------------------------------------|-----------------------------------------------------------|
| Version                                          | 1.5.2.8                                                   |
| User name                                        | aulab-p                                                   |
| Machine name                                     | WS-AU-62214                                               |
| Date of writing                                  | 06/29/2017 01:39:40                                       |
| Fixed modifications                              | Carbamidomethyl (C)                                       |
| Decoy mode                                       | revert                                                    |
| Special AAs                                      | KR                                                        |
| Include contaminants                             | True                                                      |
| MS/MS tol. (FTMS)                                | 20 ppm                                                    |
| Top MS/MS peaks per 100 Da. (FTMS)               | 12                                                        |
| MS/MS deisotoping (FTMS)                         | True                                                      |
| MS/MS tol. (ITMS)                                | 0.5 Da                                                    |
| Top MS/MS peaks per 100 Da. (ITMS)               | 8                                                         |
| MS/MS deisotoping (ITMS)                         | False                                                     |
| MS/MS tol. (TOF)                                 | 40 ppm                                                    |
| Top MS/MS peaks per 100 Da. (TOF)                | 10                                                        |
| MS/MS deisotoping (TOF)                          | True                                                      |
| MS/MS tol. (Unknown)                             | 0.5 Da                                                    |
| Top MS/MS peaks per 100 Da. (Unknown)            | 8                                                         |
| MS/MS deisotoping (Unknown)                      | False                                                     |
| PSM FDR                                          | 0.01                                                      |
| Protein FDR                                      | 0.01                                                      |
| Site FDR                                         | 0.01                                                      |
| Use Normalized Ratios For Occupancy              | True                                                      |
| Min. peptide Length                              | 6                                                         |
| Min. score for unmodified peptides               | 0                                                         |
| Min. score for modified peptides                 | 40                                                        |
| Min. delta score for unmodified peptides         | 0                                                         |
| Min. delta score for modified peptides           | 6                                                         |
| Min. unique peptides                             | 0                                                         |
| Min. razor peptides                              | 1                                                         |
| Min. peptides                                    | 1                                                         |
| Use only unmodified peptides and                 | True                                                      |
| Modifications included in protein quantification | Acetyl (Protein N-term);Oxidation (M)                     |
| Peptides used for protein quantification         | Razor                                                     |
| Discard unmodified counterpart peptides          | True                                                      |
| Min. ratio count                                 | 2                                                         |
| Re-quantify                                      | False                                                     |
| Use delta score                                  | False                                                     |
| iBAQ                                             | True                                                      |
| iBAQ log fit                                     | True                                                      |
| Match between runs                               | True                                                      |
| Matching time window [min]                       | 5                                                         |
| Alignment time window [min]                      | 20                                                        |
| Find dependent peptides                          | False                                                     |
| Fasta file                                       | Database - Uniprot; Taxonomy - Human; Date - 10 July 2017 |
| Labeled amino acid filtering                     | True                                                      |
| Site tables                                      | Oxidation (M)Sites.txt                                    |
| Decoy mode                                       | revert                                                    |
| Special AAs                                      | KR                                                        |
| Include contaminants                             | True                                                      |
| RT shift                                         | False                                                     |
| Advanced ratios                                  | True                                                      |
| AIF correlation                                  | 0.47                                                      |
| First pass AIF correlation                       | 0.8                                                       |
| AIF topx                                         | 20                                                        |
| AIF min mass                                     | 0                                                         |
| AIF SIL weight                                   | 4                                                         |
| AIF ISO weight                                   | 2                                                         |
| AIF iterative                                    | True                                                      |
| AIF threshold FDR                                | 0.01                                                      |

Table S2 List of identified fear proteins

| Protein IDs | Protein names                                     | Gene names | Razor + unique peptides | Unique peptides | Sequence coverage (%) | Unique + razor sequence coverage (%) | Mid. weight (kDa) | Sequence length | Score  | Intensity | LFO intensity CTR_H1_R1 | LFO intensity CTR_H1_R2 | LFO intensity CTR_H1_R3 | LFO intensity HARB_H1_R1 | LFO intensity HARB_H1_R2 | LFO intensity HARB_H1_R3 | LFO intensity HARB_H2_R1 | LFO intensity HARB_H2_R2 | LFO intensity HARB_H2_R3 | LFO intensity HARB_H3_R1 | LFO intensity HARB_H3_R2 | LFO intensity HARB_H3_R3 | LFO intensity S0F_H1_R1 | LFO intensity S0F_H1_R2 | LFO intensity S0F_H1_R3 | LFO intensity S0F_H2_R1 | LFO intensity S0F_H2_R2 | LFO intensity S0F_H2_R3 | LFO intensity S0F_H3_R1 | LFO intensity S0F_H3_R2 | LFO intensity S0F_H3_R3 |           |           |           |
|-------------|---------------------------------------------------|------------|-------------------------|-----------------|-----------------------|--------------------------------------|-------------------|-----------------|--------|-----------|-------------------------|-------------------------|-------------------------|--------------------------|--------------------------|--------------------------|--------------------------|--------------------------|--------------------------|--------------------------|--------------------------|--------------------------|-------------------------|-------------------------|-------------------------|-------------------------|-------------------------|-------------------------|-------------------------|-------------------------|-------------------------|-----------|-----------|-----------|
| P19466      | 14-3-3 protein beta 1b                            | YWHAH      | 7                       | 57              | 35.8                  | 35.8                                 | 28.5              | 236             | 128    | 46019000  | 20781000                | 15377000                | 22770000                | 32160000                 | 35717000                 | 34317000                 | 16614000                 | 21202000                 | 18300000                 | 16290000                 | 14260000                 | 21541000                 | 25507000                | 11552000                | 0                       | 0                       | 0                       | 0                       | 0                       | 0                       | 0                       |           |           |           |
| P04828      | 14-3-3 protein gamma                              | YWHAJ      | 5                       | 5               | 32.4                  | 32.4                                 | 25.5              | 292             | 252    | 2720      | 40623000                | 8151000                 | 6972000                 | 62747000                 | 5885000                  | 4539000                  | 61571000                 | 52423000                 | 85403000                 | 8776000                  | 6274000                  | 86012000                 | 86022000                | 4330000                 | 0                       | 0                       | 0                       | 0                       | 0                       | 0                       | 0                       |           |           |           |
| P19467      | 14-3-3 protein zeta                               | YWHAZ      | 4                       | 4               | 32.4                  | 32.4                                 | 25.5              | 278             | 122    | 2840      | 18910000                | 14210000                | 15100000                | 28410000                 | 28410000                 | 18172000                 | 31672000                 | 31672000                 | 28410000                 | 31672000                 | 31672000                 | 28410000                 | 31672000                | 31672000                | 28410000                | 31672000                | 31672000                | 28410000                | 31672000                | 31672000                | 28410000                |           |           |           |
| P04104      | 14-3-3 protein zeta delta                         | YWHAZ      | 5                       | 5               | 34.3                  | 34.3                                 | 26.9              | 265             | 120    | 13000000  | 26078000                | 25078000                | 38530000                | 35880000                 | 26666000                 | 34360000                 | 37060000                 | 29488000                 | 29488000                 | 29488000                 | 29244000                 | 29147000                 | 30017000                | 3440000                 | 0                       | 0                       | 0                       | 0                       | 0                       | 0                       | 0                       |           |           |           |
| P05968      | 60S acidic phospholipase P1                       | PLD3       | 1                       | 1               | 15.4                  | 15.4                                 | 11.4              | 114             | 114    | 14000000  | 14000000                | 14000000                | 14000000                | 14000000                 | 14000000                 | 14000000                 | 14000000                 | 14000000                 | 14000000                 | 14000000                 | 14000000                 | 14000000                 | 14000000                | 14000000                | 14000000                | 14000000                | 14000000                | 14000000                | 14000000                | 14000000                | 14000000                | 14000000  |           |           |
| P25239      | 6-phosphogluconate dehydrogenase, decarboxylating | PCID       | 4                       | 4               | 12.4                  | 12.4                                 | 14.4              | 124             | 51.1   | 487       | 114.5                   | 20911000                | 15467000                | 17548000                 | 31745000                 | 37749000                 | 48991000                 | 28465000                 | 43598000                 | 91724000                 | 45796000                 | 26623000                 | 90413000                | 22179000                | 13999000                | 10077000                | 0                       | 0                       | 0                       | 0                       | 0                       | 0         |           |           |
| P05136      | 6-phosphofruktose-6-phosphatase                   | PFKFB3     | 2                       | 2               | 14.3                  | 14.3                                 | 14.3              | 143             | 27.5   | 258       | 70                      | 10756000                | 0                       | 0                        | 0                        | 0                        | 0                        | 0                        | 0                        | 0                        | 0                        | 0                        | 0                       | 0                       | 0                       | 0                       | 0                       | 0                       | 0                       | 0                       | 0                       | 0         |           |           |
| P08133      | Actin, alpha classed muscle                       | ACTA1      | 1                       | 1               | 28.4                  | 28.4                                 | 4.2               | 42              | 42     | 377       | 60                      | 57841000                | 34164000                | 28491000                 | 8728000                  | 11988000                 | 10770000                 | 73284000                 | 80247000                 | 4769000                  | 80247000                 | 4769000                  | 80247000                | 4769000                 | 80247000                | 4769000                 | 80247000                | 4769000                 | 80247000                | 4769000                 | 80247000                | 4769000   | 80247000  |           |
| P07099      | Actin, cytoplasmic 1                              | ACTB       | 1                       | 1               | 39.5                  | 39.5                                 | 4.2               | 42              | 42     | 377       | 5.5                     | 60022000                | 0                       | 0                        | 0                        | 0                        | 0                        | 0                        | 0                        | 0                        | 0                        | 0                        | 0                       | 0                       | 0                       | 0                       | 0                       | 0                       | 0                       | 0                       | 0                       | 0         | 0         |           |
| P04201      | Actin, cytoplasmic 2                              | ACTG1      | 18                      | 18              | 29.5                  | 29.5                                 | 4.2               | 42              | 42     | 377       | 51.8                    | 12300000                | 14310000                | 15483000                 | 4.5                      | 20337000                 | 20337000                 | 14220000                 | 15649000                 | 7520000                  | 16571000                 | 96483000                 | 11242000                | 96483000                | 11242000                | 96483000                | 11242000                | 96483000                | 11242000                | 96483000                | 11242000                | 96483000  |           |           |
| P01518      | Adenylyl cyclase-associated protein               | CAP1       | 1                       | 1               | 4.8                   | 4.8                                  | 4.8               | 48              | 31.9   | 67        | 5.4                     | 5849000                 | 0                       | 0                        | 0                        | 0                        | 0                        | 0                        | 0                        | 0                        | 0                        | 0                        | 0                       | 0                       | 0                       | 0                       | 0                       | 0                       | 0                       | 0                       | 0                       | 0         | 0         |           |
| P14580      | Adrenomedullin (ADM) [NADP+ reductase]            | ADM        | 1                       | 5               | 20.9                  | 20.9                                 | 20.9              | 209             | 48.9   | 319       | 44518000                | 47719000                | 44662000                | 17927000                 | 18899000                 | 16200000                 | 10164000                 | 14014000                 | 14099000                 | 12249000                 | 15470000                 | 15470000                 | 15470000                | 15470000                | 15470000                | 15470000                | 15470000                | 15470000                | 15470000                | 15470000                | 15470000                | 15470000  | 15470000  |           |
| P08848      | Adrenomedullin (ADM) [NADP+ reductase]            | ADM1A1     | 1                       | 5               | 14.1                  | 14.1                                 | 14.1              | 141             | 51.9   | 488       | 96891000                | 97731000                | 11171000                | 3733000                  | 4117000                  | 4117000                  | 10169000                 | 13717000                 | 11174000                 | 11174000                 | 11174000                 | 11174000                 | 11174000                | 11174000                | 11174000                | 11174000                | 11174000                | 11174000                | 11174000                | 11174000                | 11174000                | 11174000  | 11174000  |           |
| P08828      | Adrenomedullin (ADM) [NADP+ reductase]            | ADM1C1     | 4                       | 4               | 20.7                  | 20.7                                 | 20.7              | 207             | 36.8   | 332       | 16.2                    | 20471000                | 14466000                | 24617000                 | 26198000                 | 44077000                 | 4199000                  | 53702000                 | 28722000                 | 43454000                 | 37026000                 | 3186000                  | 4074000                 | 4346000                 | 4077000                 | 4346000                 | 4077000                 | 4346000                 | 4077000                 | 4346000                 | 4077000                 | 4346000   | 4077000   |           |
| P07063      | Alpha-1 Lactid phosphoglycerin 1                  | ORM1       | 8                       | 5               | 39.3                  | 39.3                                 | 36.9              | 363             | 20.1   | 139.4     | 51490000                | 53348000                | 50420000                | 65811000                 | 58814000                 | 46152000                 | 14393000                 | 14393000                 | 14393000                 | 14393000                 | 67866000                 | 67866000                 | 67866000                | 67866000                | 67866000                | 67866000                | 67866000                | 67866000                | 67866000                | 67866000                | 67866000                | 67866000  | 67866000  |           |
| P19052      | Alpha-1 Lactid phosphoglycerin 2                  | ORM2       | 2                       | 2               | 25.9                  | 25.9                                 | 13.4              | 134             | 23.6   | 20.1      | 66.2                    | 49141000                | 39797000                | 4588000                  | 4928000                  | 4276000                  | 11404000                 | 2366000                  | 6000000                  | 6000000                  | 6000000                  | 6000000                  | 6000000                 | 6000000                 | 6000000                 | 6000000                 | 6000000                 | 6000000                 | 6000000                 | 6000000                 | 6000000                 | 6000000   | 6000000   |           |
| P01011      | Alpha-2-macroglobulin                             | SERPINA1   | 10                      | 10              | 22.7                  | 22.7                                 | 22.7              | 227             | 1007.2 | 14861000  | 14861000                | 14861000                | 14861000                | 14861000                 | 14861000                 | 14861000                 | 14861000                 | 14861000                 | 14861000                 | 14861000                 | 14861000                 | 14861000                 | 14861000                | 14861000                | 14861000                | 14861000                | 14861000                | 14861000                | 14861000                | 14861000                | 14861000                | 14861000  | 14861000  | 14861000  |
| P10029      | Alpha-2-macroglobulin                             | SERPINA1   | 30                      | 30              | 67.9                  | 67.9                                 | 46.7              | 418             | 32.3   | 205960000 | 226290000               | 261980000               | 258100000               | 229600000                | 214000000                | 226010000                | 202600000                | 166610000                | 157400000                | 340040000                | 289220000                | 217940000                | 130880000               | 137000000               | 103000000               | 618000000               | 349800000               | 349800000               | 349800000               | 349800000               | 349800000               | 349800000 | 349800000 |           |
| P04177      | Alpha-2-macroglobulin                             | ALB        | 6                       | 6               | 21.6                  | 21.6                                 | 21.6              | 216             | 40.5   | 98.6      | 94511000                | 11883000                | 26170000                | 32353000                 | 15253000                 | 14335000                 | 9003000                  | 9660000                  | 11661000                 | 15740000                 | 34004000                 | 289220000                | 217940000               | 130880000               | 618000000               | 349800000               | 349800000               | 349800000               | 349800000               | 349800000               | 349800000               | 349800000 | 349800000 |           |
| P02785      | Alpha-2-macroglobulin                             | ALB        | 30                      | 30              | 35.1                  | 35.1                                 | 35.1              | 351             | 100.7  | 267       | 15570000                | 14420000                | 19710000                | 16019000                 | 14420000                 | 9442000                  | 9442000                  | 9442000                  | 9442000                  | 9442000                  | 9442000                  | 9442000                  | 9442000                 | 9442000                 | 9442000                 | 9442000                 | 9442000                 | 9442000                 | 9442000                 | 9442000                 | 9442000                 | 9442000   | 9442000   | 9442000   |
| P01023      | Alpha-2-macroglobulin                             | ALB        | 35                      | 35              | 34.1                  | 34.1                                 | 34.1              | 341             | 163.3  | 1474      | 323.3                   | 439740000               | 275210000               | 301200000                | 310200000                | 278820000                | 30033000                 | 30033000                 | 30033000                 | 30033000                 | 30033000                 | 30033000                 | 30033000                | 30033000                | 30033000                | 30033000                | 30033000                | 30033000                | 30033000                | 30033000                | 30033000                | 30033000  | 30033000  | 30033000  |
| P04178      | Alpha-actinin-4                                   | ACTN4      | 10                      | 10              | 15.2                  | 15.2                                 | 10.9              | 109             | 9.1    | 134       | 2890000                 | 8600000                 | 8600000                 | 8600000                  | 8600000                  | 8600000                  | 8600000                  | 8600000                  | 8600000                  | 8600000                  | 8600000                  | 8600000                  | 8600000                 | 8600000                 | 8600000                 | 8600000                 | 8600000                 | 8600000                 | 8600000                 | 8600000                 | 8600000                 | 8600000   | 8600000   | 8600000   |
| P06733      | Alpha-actinin-4                                   | ACTN4      | 29                      | 29              | 25.9                  | 25.9                                 | 25.9              | 259             | 42.4   | 62.4      | 147970000               | 109270000               | 62.2                    | 147970000                | 21599000                 | 16139000                 | 16139000                 | 16139000                 | 16139000                 | 16139000                 | 16139000                 | 16139000                 | 16139000                | 16139000                | 16139000                | 16139000                | 16139000                | 16139000                | 16139000                | 16139000                | 16139000                | 16139000  | 16139000  | 16139000  |
| P01019      | Anticoagulant                                     | AIT1       | 6                       | 6               | 19.8                  | 19.8                                 | 19.8              | 198             | 35.2   | 485       | 487                     | 76681000                | 18222000                | 3756000                  | 3756000                  | 3756000                  | 3756000                  | 3756000                  | 3756000                  | 3756000                  | 3756000                  | 3756000                  | 3756000                 | 3756000                 | 3756000                 | 3756000                 | 3756000                 | 3756000                 | 3756000                 | 3756000                 | 3756000                 | 3756000   | 3756000   |           |
| P08681      | AnkR1                                             | ANKK1      | 17                      | 17              | 44.8                  | 44.8                                 | 34.8              | 348             | 32.3   | 70899000  | 152230000               | 140000000               | 171600000               | 171600000                | 171600000                | 171600000                | 171600000                | 171600000                | 171600000                | 171600000                | 171600000                | 171600000                | 171600000               | 171600000               | 171600000               | 171600000               | 171600000               | 171600000               | 171600000               | 171600000               | 171600000               | 171600000 | 171600000 | 171600000 |
| P07555      | AnkR2                                             | ANKK2      | 19                      | 19              | 64.0                  | 64.0                                 | 44.0              | 440             | 38.6   | 339       | 323.3                   | 47272000                | 38234000                | 38234000                 | 10588000                 | 13047000                 | 10874000                 | 3768000                  | 10240000                 | 36081000                 | 36081000                 | 36081000                 | 36081000                | 36081000                | 36081000                | 36081000                | 36081000                | 36081000                | 36081000                | 36081000                | 36081000                | 36081000  | 36081000  | 36081000  |
| P14249      | AnkR3                                             | ANKK3      | 3                       | 3               | 12.4                  | 12.4                                 | 12.4              | 124             | 36.4   | 323       | 30.7                    | 4370000                 | 5961000                 | 16014000                 | 60142000                 | 7222000                  | 85234000                 | 7322000                  | 3300000                  | 3171000                  | 3869000                  | 64857000                 | 10253000                | 3842000                 | 2919000                 | 4609000                 | 0                       | 0                       | 0                       | 0                       | 0                       | 0         | 0         |           |
| P06525      | AnkR4                                             | ANKK4      | 10                      | 10              | 29.9                  | 29.9                                 | 29.9              | 299             | 41.4   | 459       | 31000000                | 14732000                | 14732000                | 14732000                 | 14732000                 | 14732000                 | 14732000                 | 14732000                 | 14732000                 | 14732000                 | 14732000                 | 14732000                 | 14732000                | 14732000                | 14732000                | 14732000                | 14732000                | 14732000                | 14732000                | 14732000                | 14732000                | 14732000  | 14732000  | 14732000  |
| P08785      | AnkR5                                             | ANKK5      | 10                      | 10              | 40.6                  | 40.6                                 | 35.9              | 359             | 40.6   | 35.9      | 32.0                    | 156.5                   | 14817000                | 2419000                  | 2538000                  | 35481000                 | 35481000                 | 35481000                 | 35481000                 | 35481000                 | 35481000                 | 35481000                 | 35481000                | 35481000                | 35481000                | 35481000                | 35481000                | 35481000                | 35481000                | 35481000                | 35481000                | 35481000  | 35481000  | 35481000  |
| P09994      | Anterior gradient protein 2 homolog               | AGR2       | 4                       | 4               | 30.3                  | 30.3                                 |                   |                 |        |           |                         |                         |                         |                          |                          |                          |                          |                          |                          |                          |                          |                          |                         |                         |                         |                         |                         |                         |                         |                         |                         |           |           |           |



Table S3 The degree of variances in the tear proteome between the (a) replicates and (b) groups assessed by Pearson's correlation analysis.

(a)

| Name                    | LFQ intensity CTRL_R1 | LFQ intensity CTRL_R2 | LFQ intensity CTRL_R3 | LFQ intensity Hard A_R1 | LFQ intensity Hard A_R2 | LFQ intensity Hard A_R3 | LFQ intensity Hard B_R1 | LFQ intensity Hard B_R2 | LFQ intensity Hard B_R3 | LFQ intensity Soft A_R1 | LFQ intensity Soft A_R2 | LFQ intensity Soft A_R3 | LFQ intensity Soft B_R1 | LFQ intensity Soft B_R2 | LFQ intensity Soft B_R3 |
|-------------------------|-----------------------|-----------------------|-----------------------|-------------------------|-------------------------|-------------------------|-------------------------|-------------------------|-------------------------|-------------------------|-------------------------|-------------------------|-------------------------|-------------------------|-------------------------|
| LFQ intensity CTRL_R1   | NaN                   | <b>0.99</b>           | <b>0.99</b>           | 0.92                    | 0.90                    | 0.98                    | 0.99                    | 0.98                    | 0.97                    | 0.98                    | 0.98                    | 0.99                    | 0.98                    | 0.97                    | 0.97                    |
| LFQ intensity CTRL_R2   | <b>0.99</b>           | NaN                   | <b>1.00</b>           | 0.95                    | 0.93                    | 0.98                    | 0.99                    | 0.99                    | 0.99                    | 0.97                    | 0.97                    | 0.98                    | 0.98                    | 0.96                    | 0.97                    |
| LFQ intensity CTRL_R3   | <b>0.99</b>           | <b>1.00</b>           | NaN                   | 0.94                    | 0.93                    | 0.98                    | 0.99                    | 0.98                    | 0.98                    | 0.97                    | 0.96                    | 0.98                    | 0.97                    | 0.96                    | 0.96                    |
| LFQ intensity Hard A_R1 | 0.92                  | 0.95                  | 0.94                  | NaN                     | <b>0.98</b>             | <b>0.95</b>             | 0.95                    | 0.95                    | 0.96                    | 0.89                    | 0.88                    | 0.91                    | 0.90                    | 0.87                    | 0.90                    |
| LFQ intensity Hard A_R2 | 0.90                  | 0.93                  | 0.93                  | <b>0.98</b>             | NaN                     | <b>0.95</b>             | 0.94                    | 0.95                    | 0.96                    | 0.86                    | 0.86                    | 0.89                    | 0.86                    | 0.82                    | 0.85                    |
| LFQ intensity Hard A_R3 | 0.98                  | 0.98                  | 0.98                  | <b>0.95</b>             | <b>0.95</b>             | NaN                     | 0.99                    | 0.99                    | 0.98                    | 0.97                    | 0.97                    | 0.98                    | 0.95                    | 0.93                    | 0.94                    |
| LFQ intensity Hard B_R1 | 0.99                  | 0.99                  | 0.99                  | 0.95                    | 0.94                    | 0.99                    | NaN                     | <b>0.99</b>             | <b>0.99</b>             | 0.97                    | 0.97                    | 0.98                    | 0.97                    | 0.96                    | 0.96                    |
| LFQ intensity Hard B_R2 | 0.98                  | 0.99                  | 0.98                  | 0.95                    | 0.95                    | 0.99                    | <b>0.99</b>             | NaN                     | <b>0.99</b>             | 0.96                    | 0.96                    | 0.98                    | 0.96                    | 0.94                    | 0.95                    |
| LFQ intensity Hard B_R3 | 0.97                  | 0.99                  | 0.98                  | 0.96                    | 0.96                    | 0.98                    | <b>0.99</b>             | <b>0.99</b>             | NaN                     | 0.95                    | 0.94                    | 0.96                    | 0.95                    | 0.93                    | 0.94                    |
| LFQ intensity Soft A_R1 | 0.98                  | 0.97                  | 0.97                  | 0.89                    | 0.86                    | 0.97                    | 0.97                    | 0.96                    | 0.95                    | NaN                     | <b>0.99</b>             | <b>1.00</b>             | 0.99                    | 0.98                    | 0.97                    |
| LFQ intensity Soft A_R2 | 0.98                  | 0.97                  | 0.96                  | 0.88                    | 0.86                    | 0.97                    | 0.97                    | 0.96                    | 0.94                    | <b>0.99</b>             | NaN                     | <b>1.00</b>             | 0.98                    | 0.97                    | 0.96                    |
| LFQ intensity Soft A_R3 | 0.99                  | 0.98                  | 0.98                  | 0.91                    | 0.89                    | 0.98                    | 0.98                    | 0.98                    | 0.96                    | <b>1.00</b>             | <b>1.00</b>             | NaN                     | 0.98                    | 0.97                    | 0.97                    |
| LFQ intensity Soft B_R1 | 0.98                  | 0.98                  | 0.97                  | 0.90                    | 0.86                    | 0.95                    | 0.97                    | 0.96                    | 0.95                    | 0.99                    | 0.98                    | 0.98                    | NaN                     | <b>0.99</b>             | <b>0.99</b>             |
| LFQ intensity Soft B_R2 | 0.97                  | 0.96                  | 0.96                  | 0.87                    | 0.82                    | 0.93                    | 0.96                    | 0.94                    | 0.93                    | 0.98                    | 0.97                    | 0.97                    | <b>0.99</b>             | NaN                     | <b>0.99</b>             |
| LFQ intensity Soft B_R3 | 0.97                  | 0.97                  | 0.96                  | 0.90                    | 0.85                    | 0.94                    | 0.96                    | 0.95                    | 0.94                    | 0.97                    | 0.96                    | 0.97                    | <b>0.99</b>             | <b>0.99</b>             | NaN                     |

(b)

|                      | LFQ intensity CTRL   | LFQ intensity Hard A | LFQ intensity Hard B | LFQ intensity Soft A | LFQ intensity Soft B |
|----------------------|----------------------|----------------------|----------------------|----------------------|----------------------|
| LFQ intensity CTRL   | <b>0.995 ± 0.003</b> | 0.946 ± 0.028        | 0.984 ± 0.007        | 0.976 ± 0.008        | 0.968 ± 0.007        |
| LFQ intensity Hard A | 0.946 ± 0.028        | <b>0.959 ± 0.017</b> | 0.963 ± 0.020        | 0.911 ± 0.048        | 0.890 ± 0.046        |
| LFQ intensity Hard B | 0.984 ± 0.007        | 0.963 ± 0.020        | <b>0.993 ± 0.001</b> | 0.964 ± 0.014        | 0.950 ± 0.013        |
| LFQ intensity Soft A | 0.976 ± 0.008        | 0.911 ± 0.048        | 0.964 ± 0.014        | <b>0.995 ± 0.001</b> | 0.975 ± 0.009        |
| LFQ intensity Soft B | 0.968 ± 0.007        | 0.890 ± 0.046        | 0.950 ± 0.013        | 0.975 ± 0.009        | <b>0.993 ± 0.002</b> |

**Table S4** Differentially expressed tear proteins restored to normal or near normal levels following renouncement of hard contact lens

| Protein ID | Protein name                            | Gene name | Hard A/CTRL    | Hard A/CTRL       | Hard B/Hard A  | Hard B/Hard A     |
|------------|-----------------------------------------|-----------|----------------|-------------------|----------------|-------------------|
|            |                                         |           | t-test p value | t-test difference | t-test p value | t-test difference |
| P80303     | Nucleobindin-2                          | NUCB2     | 6.74E-08       | -23.1204          | 9.37E-08       | 22.8957           |
| Q96LW4     | DNA-directed primase/polymerase protein | PRIMPOL   | 5.13E-08       | -22.2765          | 1.23E-12       | 21.7722           |
| Q9GZZ8     | Extracellular glycoprotein lacritin     | LACRT     | 9.64E-06       | -3.27048          | 0.000127961    | 0.946314          |
| P0DP08     | Ig heavy chain V-II region NEWM         | IGHV4-4   | 0.0459192      | -1.66699          | 0.0184549      | 2.23576           |
| P01833     | Polymeric immunoglobulin receptor       | PIGR      | 0.000735725    | -1.0122           | 0.00135836     | 0.705582          |
| Q96DA0     | Zymogen granule protein 16 homolog B    | ZG16B     | 0.00691179     | -0.642043         | 0.0400133      | 0.549627          |
| P02787     | Serotransferrin                         | TF        | 0.0485373      | 0.485277          | 0.00901612     | -0.806985         |
| P12429     | Annexin A3                              | ANXA3     | 0.01255        | 0.557257          | 0.0203503      | -0.826279         |
| P60174     | Triosephosphate isomerase               | TPI1      | 0.0445722      | 0.561307          | 0.0133209      | -0.731908         |
| P01024     | Complement C3                           | C3        | 0.000216808    | 0.58034           | 0.00276314     | -0.508984         |
| P06312     | Ig kappa chain V-IV region              | IGKV4-1   | 0.0441418      | 0.662347          | 0.0271293      | -0.530631         |
| P01008     | Antithrombin-III                        | SERPINC1  | 0.049337       | 0.692117          | 0.0302766      | -0.792411         |
| P40925     | Malate dehydrogenase, cytoplasmic       | MDH1      | 0.00705303     | 0.701432          | 0.0186406      | -0.522416         |
| Q99935     | Proline-rich protein 1                  | PROL1     | 0.0238565      | 0.707614          | 0.00497106     | -1.10771          |
| Q13228     | Selenium-binding protein 1              | SELENBP1  | 0.0152762      | 0.746237          | 0.0333095      | -0.636588         |

|        |                                                                      |         |             |          |             |           |
|--------|----------------------------------------------------------------------|---------|-------------|----------|-------------|-----------|
| P31946 | 14-3-3 protein beta/alpha                                            | YWHAB   | 0.00991322  | 0.80884  | 0.0026455   | -0.848101 |
| P01034 | Cystatin-C                                                           | CST3    | 0.00107646  | 0.811762 | 0.000723647 | -1.56093  |
| P04080 | Cystatin-B                                                           | CSTB    | 0.044042    | 0.84649  | 0.010676    | -1.40647  |
| P01834 | Ig kappa chain C region                                              | IGKC    | 0.0233074   | 0.962351 | 0.012219    | -1.17825  |
| P00352 | Retinal dehydrogenase 1                                              | ALDH1A1 | 0.000486025 | 0.999151 | 0.0221524   | -0.385969 |
| Q04828 | Aldo-keto reductase family 1 member C1                               | AKR1C1  | 0.00344507  | 1.00913  | 0.0224532   | -0.82121  |
| P10599 | Thioredoxin                                                          | TXN     | 0.00460263  | 1.14729  | 0.0337251   | -0.717325 |
| P21980 | Protein-glutamine gamma-glutamyltransferase 2                        | TGM2    | 0.00923312  | 1.25514  | 0.00771404  | -1.23838  |
| P01023 | Alpha-2-macroglobulin                                                | A2M     | 0.00189417  | 1.38653  | 0.00033579  | -1.75099  |
| P15311 | Ezrin                                                                | EZR     | 0.00165127  | 1.69643  | 0.0305612   | -1.23247  |
| P98160 | Basement membrane-specific heparan sulfate proteoglycan core protein | HSPG2   | 0.00133399  | 1.70064  | 0.0162177   | -0.442127 |
| P04406 | Glyceraldehyde-3-phosphate dehydrogenase                             | GAPDH   | 3.73E-05    | 1.75228  | 0.0340754   | -0.522034 |
| P14550 | Alcohol dehydrogenase [NADP(+)]                                      | AKR1A1  | 1.07E-05    | 1.95248  | 0.0336889   | -0.597106 |
| P09467 | Fructose-1,6-bisphosphatase 1                                        | FBP1    | 0.000140307 | 2.50008  | 0.017434    | -1.15092  |
| P30041 | Peroxiredoxin-6                                                      | PRDX6   | 0.00126659  | 3.07181  | 0.00233273  | -1.63297  |

**Table S5** Differentially expressed tear proteins that were restored to normal or near normal levels following renouncement of soft contact lenses

| Protein ID | Protein name                         | Gene name | Soft A/CTRL    | Soft A/CTRL       | Soft B/Soft A  | Soft B/Soft A     |
|------------|--------------------------------------|-----------|----------------|-------------------|----------------|-------------------|
|            |                                      |           | t-test p value | t-test difference | t-test p value | t-test difference |
| P20061     | Transcobalamin-1                     | TCN1      | 0.000536241    | -1.39779          | 0.0194972      | 1.14146           |
| Q13421     | Mesothelin                           | MSLN      | 0.000560973    | -1.08202          | 0.019067       | 0.381095          |
| Q96DA0     | Zymogen granule protein 16 homolog B | ZG16B     | 0.00537381     | -0.901301         | 0.025062       | 0.412584          |
| Q99935     | Proline-rich protein 1               | PROL1     | 0.00387322     | -0.895296         | 0.00500459     | 0.847507          |
| P01876     | Ig alpha-1 chain C region            | IGHA1     | 0.00207708     | -0.850877         | 0.00566909     | 0.842374          |
| P10909     | Clusterin                            | CLU       | 0.00344228     | -0.602778         | 0.0134948      | 0.472013          |
| P25311     | Zinc-alpha-2-glycoprotein            | AZGP1     | 0.00251442     | -0.59874          | 0.00775825     | 0.634696          |
| P02766     | Transthyretin                        | TTR       | 0.0129762      | -0.596889         | 0.00301547     | 0.78727           |
| O75556     | Mammaglobin-B                        | SCGB2A1   | 0.00134163     | -0.555702         | 0.0309456      | 0.449009          |
| P07858     | Cathepsin B                          | CTSB      | 0.0194062      | -0.519465         | 0.00723964     | 0.853257          |
| P01833     | Polymeric immunoglobulin receptor    | PIGR      | 0.00349671     | -0.510782         | 0.0066351      | 0.414106          |
| P61626     | Lysozyme C                           | LYZ       | 0.0329406      | -0.479423         | 0.00286996     | 1.01167           |



|        |                                            |          |             |          |            |           |
|--------|--------------------------------------------|----------|-------------|----------|------------|-----------|
| P09211 | Glutathione S-transferase P                | GSTP1    | 0.000255522 | 0.379524 | 0.0465344  | -0.644709 |
| P06733 | Alpha-enolase                              | ENO1     | 0.0156537   | 0.472191 | 0.0332919  | -0.764221 |
| P02749 | Beta-2-glycoprotein 1                      | APOH     | 0.00308197  | 0.513513 | 0.00185552 | -0.639037 |
| Q06830 | Peroxiredoxin-1                            | PRDX1    | 0.0392907   | 0.517227 | 0.0492212  | -0.439258 |
| P01859 | Ig gamma-2 chain C region                  | IGHG2    | 0.00606619  | 0.545203 | 0.0310358  | -0.280219 |
| P01009 | Alpha-1-antitrypsin                        | SERPINA1 | 0.00105742  | 0.677276 | 0.0178656  | -0.313815 |
| P01008 | Antithrombin-III                           | SERPINC1 | 0.0343189   | 0.70122  | 0.0379374  | -0.320943 |
| P01857 | Ig gamma-1 chain C region                  | IGHG1    | 0.000484682 | 0.748166 | 0.00241463 | -0.378359 |
| P01019 | Angiotensinogen                            | AGT      | 0.0127924   | 0.784323 | 0.00433753 | -0.651071 |
| P30086 | Phosphatidylethanolamine-binding protein 1 | PEBP1    | 8.21E-05    | 0.834803 | 0.0326834  | -0.24179  |
| P04083 | Annexin A1                                 | ANXA1    | 0.00388359  | 0.904558 | 0.0286612  | -1.04397  |
| P02774 | Vitamin D-binding protein                  | GC       | 0.00243967  | 0.906768 | 0.00659062 | -0.693193 |
| P04406 | Glyceraldehyde-3-phosphate dehydrogenase   | GAPDH    | 0.00488883  | 0.919466 | 0.0337512  | -0.709533 |

|        |                                              |          |             |         |            |           |
|--------|----------------------------------------------|----------|-------------|---------|------------|-----------|
| P01023 | Alpha-2-macroglobulin                        | A2M      | 0.0105935   | 1.15943 | 0.00331981 | -1.77033  |
| P19823 | Inter-alpha-trypsin inhibitor heavy chain H2 | ITIH2    | 0.00882564  | 1.2231  | 0.0145121  | -1.49804  |
| P07355 | Annexin A2                                   | ANXA2    | 0.000100754 | 1.36391 | 0.00972864 | -1.23912  |
| P02787 | Serotransferrin                              | TF       | 1.28E-05    | 1.4175  | 3.18E-05   | -0.767886 |
| P09467 | Fructose-1,6-bisphosphatase 1                | FBP1     | 0.000398519 | 1.62834 | 4.46E-09   | -22.2984  |
| P30044 | Peroxiredoxin-5, mitochondrial               | PRDX5    | 0.00469036  | 1.63648 | 0.00259444 | -1.45671  |
| P14550 | Alcohol dehydrogenase [NADP(+)]              | AKR1A1   | 0.000139363 | 1.6585  | 0.00325967 | -1.03635  |
| P36955 | Pigment epithelium-derived factor            | SERPINF1 | 3.49E-08    | 18.2145 | 3.49E-08   | -18.2145  |
| P07237 | Protein disulfide-isomerase                  | P4HB     | 6.32E-09    | 19.0275 | 6.32E-09   | -19.0275  |
| Q9P1F3 | Costars family protein ABRACL                | ABRACL   | 1.77E-07    | 19.6917 | 1.77E-07   | -19.6917  |
| P31941 | DNA dC->dU-editing enzyme APOBEC-3A          | APOBEC3A | 9.82E-08    | 20.3161 | 9.82E-08   | -20.3161  |
| P01717 | Ig lambda chain V-IV region Hil              | IGLV3-10 | 1.75E-08    | 20.6645 | 1.75E-08   | -20.6645  |
| P07339 | Cathepsin D                                  | CTSD     | 4.27E-07    | 20.8041 | 4.27E-07   | -20.8041  |

---

|        |                               |       |          |         |           |          |
|--------|-------------------------------|-------|----------|---------|-----------|----------|
| P31947 | 14-3-3 protein sigma          | SFN   | 1.25E-08 | 21.3169 | 1.25E-08  | -21.3169 |
| P25815 | Protein S100-P                | S100P | 9.51E-08 | 21.5193 | 0.0157788 | -1.27653 |
| P06744 | Glucose-6-phosphate isomerase | GPI   | 8.55E-11 | 21.5446 | 8.55E-11  | -21.5446 |
| P02753 | Retinol-binding protein 4     | RBP4  | 5.72E-06 | 22.1481 | 5.72E-06  | -22.1481 |
| P01594 | Ig kappa chain V-I region AU  |       | 1.43E-10 | 22.1812 | 1.43E-10  | -22.1812 |

---

**Table S6** Differentially expressed tear proteins that were not restored to normal or near normal levels following renouncement of hard contact lenses

| Protein ID | Protein name                               | Gene name | Hard A/CTRL    | Hard A/CTRL       | Hard B/Hard A  | Hard B/Hard A     |
|------------|--------------------------------------------|-----------|----------------|-------------------|----------------|-------------------|
|            |                                            |           | t-test p value | t-test difference | t-test p value | t-test difference |
| P28325     | Cystatin-D                                 | CST5      | 1.13E-10       | -20.5094          | 1              | 0                 |
| P02533     | Keratin, type I cytoskeletal 14            | KRT14     | 0.0424658      | -1.83581          | 0.627139       | 0.150271          |
| P35527     | Keratin, type I cytoskeletal 9             | KRT9      | 0.0256558      | -1.80655          | 0.291764       | 0.605708          |
| P04217     | Alpha-1B-glycoprotein                      | A1BG      | 0.0381718      | -1.00382          | 0.781421       | -0.0953973        |
| Q13421     | Mesothelin                                 | MSLN      | 0.00636721     | -0.928525         | 0.95663        | 0.0104383         |
| P25311     | Zinc-alpha-2-glycoprotein                  | AZGP1     | 0.0313137      | -0.921553         | 0.979942       | -0.0225919        |
| O75556     | Mammaglobin-B                              | SCGB2A1   | 0.0405104      | -0.809256         | 0.979318       | 0.0101598         |
| P01036     | Cystatin-S                                 | CST4      | 0.0316764      | -0.690727         | 0.535037       | 0.109827          |
| P07858     | Cathepsin B                                | CTSB      | 0.00250325     | -0.594305         | 0.473023       | 0.245778          |
| P12273     | Prolactin-inducible protein                | PIP       | 0.00647886     | -0.569149         | 0.116147       | 0.367425          |
| P08758     | Annexin A5                                 | ANXA5     | 0.024728       | 0.468018          | 0.151901       | -0.349899         |
| P01780     | Ig heavy chain V-III region JON            |           | 0.0373057      | 0.555737          | 0.962035       | -0.00873057       |
| P30086     | Phosphatidylethanolamine-binding protein 1 | PEBP1     | 0.0207136      | 0.629482          | 0.13004        | -0.326293         |

|        |                                           |          |             |          |           |            |
|--------|-------------------------------------------|----------|-------------|----------|-----------|------------|
| P09211 | Glutathione S-transferase P               | GSTP1    | 0.000122387 | 0.758188 | 0.0592956 | -0.214745  |
| Q06830 | Peroxiredoxin-1                           | PRDX1    | 0.00492382  | 0.811836 | 0.240345  | -0.170243  |
| P50395 | Rab GDP dissociation inhibitor beta       | GDI2     | 0.00864002  | 0.85346  | 0.324602  | -7.7469    |
| P04792 | Heat shock protein beta-1                 | HSPB1    | 0.0156339   | 0.954453 | 0.0925576 | -0.511541  |
| P00338 | L-lactate dehydrogenase A chain           | LDHA     | 0.0251644   | 1.07479  | 0.0555952 | -0.778293  |
| P30044 | Peroxiredoxin-5, mitochondrial            | PRDX5    | 0.013781    | 1.08386  | 0.0990585 | -0.85895   |
| P14618 | Pyruvate kinase PKM                       | PKM      | 0.00570498  | 1.25685  | 0.600758  | -0.0840111 |
| P06396 | Gelsolin                                  | GSN      | 0.0199829   | 1.30002  | 0.160116  | -0.573783  |
| P07355 | Annexin A2                                | ANXA2    | 0.000105848 | 1.65505  | 0.0690037 | -0.440093  |
| P04083 | Annexin A1                                | ANXA1    | 0.000343761 | 1.67713  | 0.400233  | -0.189219  |
| P68104 | Putative elongation factor 1-alpha-like 3 | EEF1A1P5 | 0.026819    | 1.73869  | 0.34821   | -0.630824  |
| P07237 | Protein disulfide-isomerase               | P4HB     | 1.33E-05    | 20.465   | 0.259079  | -1.05339   |
| P31947 | 14-3-3 protein sigma                      | SFN      | 1.84E-07    | 21.4674  | 0.298178  | 0.489133   |
| P06744 | Glucose-6-phosphate isomerase             | GPI      | 3.39E-07    | 22.0905  | 0.162099  | -0.597249  |

**Table S7** Differentially expressed tear proteins that were not restored to normal or near normal levels following renouncement of soft contact lenses

| Protein ID  | Protein name                               | Gene name | Soft A/CTRL    | Soft A/CTRL       | Soft B/Soft A  | Soft B/Soft A     |
|-------------|--------------------------------------------|-----------|----------------|-------------------|----------------|-------------------|
|             |                                            |           | t-test p value | t-test difference | t-test p value | t-test difference |
| P30085      | UMP-CMP kinase                             | CMPK1     | 3.10E-10       | -21.0936          | 1              | 0                 |
| Q96KP4      | Cytosolic non-specific dipeptidase         | CNDP2     | 6.24E-10       | -20.9921          | 1              | 0                 |
| P28325      | Cystatin-D                                 | CST5      | 1.13E-10       | -20.5094          | 1              | 0                 |
| Q9GZZ8      | Extracellular glycoprotein lacritin        | LACRT     | 6.91E-05       | -2.08325          | 0.0912392      | 0.480766          |
| P80303      | Nucleobindin-2                             | NUCB2     | 0.0121563      | -1.18659          | 0.850738       | 0.0635026         |
| P14618      | Pyruvate kinase PKM                        | PKM       | 0.00686079     | -1.1482           | 0.463375       | 0.0986938         |
| P35908      | Keratin, type II cytoskeletal 2 epidermal  | KRT2      | 0.0138746      | -0.860073         | 0.149141       | 0.868804          |
| P80188      | Neutrophil gelatinase-associated lipocalin | LCN2      | 0.00408174     | -0.770945         | 0.262706       | 0.375579          |
| CON__P13645 | Keratin, type I cytoskeletal 10            | KRT10     | 0.0342843      | -0.715617         | 0.183926       | 0.716726          |
| O95994      | Anterior gradient protein 2 homolog        | AGR2      | 0.0201302      | -0.610341         | 0.0728174      | -1.2511           |

|        |                                     |          |             |           |          |            |
|--------|-------------------------------------|----------|-------------|-----------|----------|------------|
| P63261 | Actin, cytoplasmic 2                | ACTG1    | 0.0154208   | -0.475075 | 0.932412 | -0.0123431 |
| P02768 | Serum albumin                       | ALB      | 0.0275545   | 0.110739  | 0.114849 | 0.0855484  |
| P01024 | Complement C3                       | C3       | 0.0332818   | 0.16916   | 0.212821 | -0.2029    |
| P02763 | Alpha-1-acid glycoprotein 1         | ORM1     | 0.0252244   | 0.216868  | 0.253601 | -0.166636  |
| P00738 | Haptoglobin                         | HP       | 0.000664556 | 0.229911  | 0.055372 | 0.27194    |
| P19652 | Alpha-1-acid glycoprotein 2         | ORM2     | 0.043632    | 0.340018  | 0.322546 | -8.09206   |
| P00558 | Phosphoglycerate kinase 1           | PGK1     | 0.0235661   | 0.400577  | 0.105992 | -15.5423   |
| P60174 | Triosephosphate isomerase           | TPI1     | 0.0413993   | 0.404948  | 0.75273  | -0.168723  |
| P01011 | Alpha-1-antichymotrypsin            | SERPINA3 | 0.042634    | 0.448003  | 0.101813 | 0.193193   |
| P06396 | Gelsolin                            | GSN      | 0.0201163   | 0.532289  | 0.21816  | -0.123309  |
| P26447 | Protein S100-A4                     | S100A4   | 0.0374457   | 0.766703  | 0.465031 | -0.302301  |
| P02647 | Apolipoprotein A-I                  | APOA1    | 0.00963617  | 0.878042  | 0.257336 | -0.589225  |
| P62987 | Ubiquitin-60S ribosomal protein L40 | UBA52    | 0.00950648  | 0.887589  | 0.77315  | -0.0617619 |
| P06703 | Protein S100-A6                     | S100A6   | 0.0192174   | 0.9396    | 0.363222 | -0.58531   |

---

|        |                                       |       |            |         |           |           |
|--------|---------------------------------------|-------|------------|---------|-----------|-----------|
| Q01469 | Fatty acid-binding protein, epidermal | FABP5 | 0.00103605 | 1.49002 | 0.468924  | 0.231202  |
| P13647 | Keratin, type II cytoskeletal 5       | KRT5  | 2.90E-11   | 19.1201 | 0.175568  | 1.27628   |
| P04004 | Vitronectin                           | VTN   | 3.51E-09   | 20.7411 | 0.328128  | -0.294021 |
| Q9Y5Z4 | Heme-binding protein 2                | HEBP2 | 1.39E-07   | 21.5273 | 0.0981464 | -0.625937 |

---



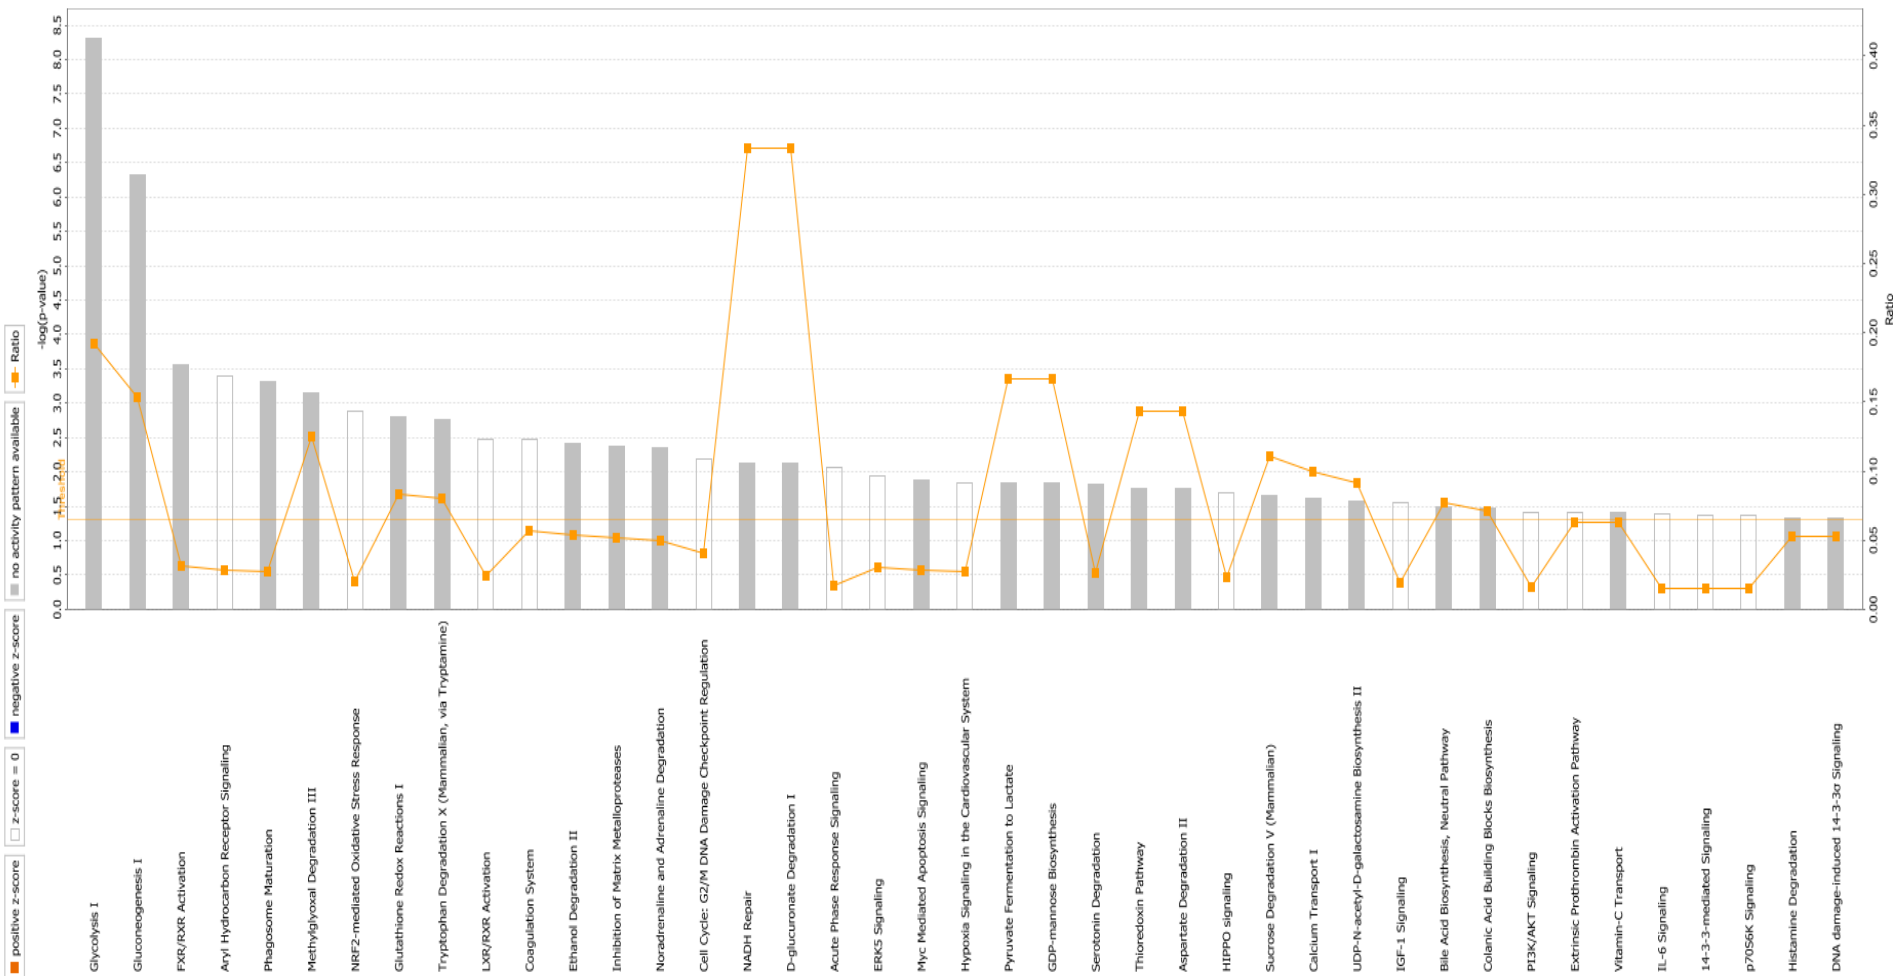

**Figure S1. Canonical pathways of hard CL tear proteins.** Top canonical pathways found to be significantly ( $p < 0.05$ ) altered following the use of hard CLs identified by Ingenuity Pathway Analysis. The p-values of the proteins within the each canonical pathway was determined using the Benjamini-Hochberg corrected Fisher's exact test and ratio indicate the number of molecules in the dataset associated with a pathway to the total number of molecules identified in that particular pathway.

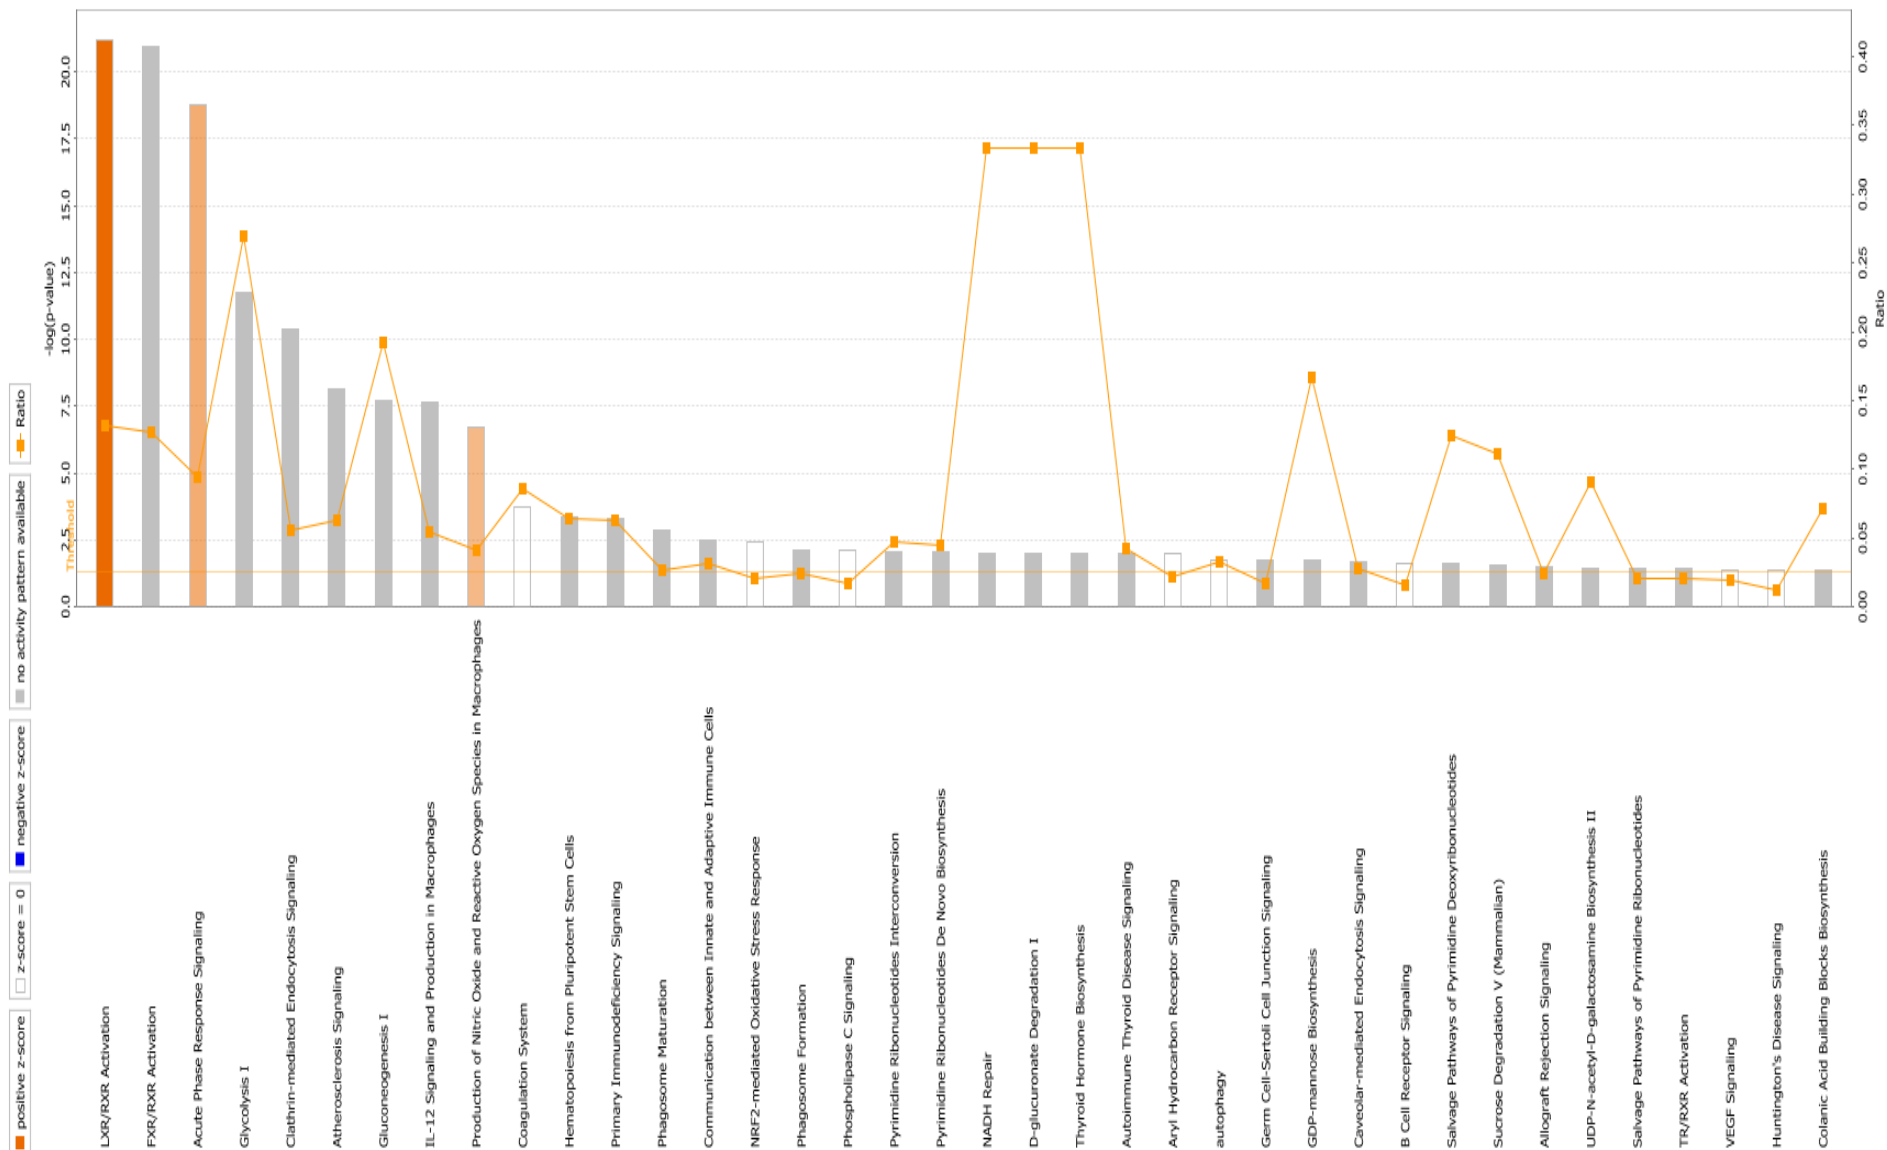

**Figure S2. Canonical pathways of soft CL tear proteins.** Major canonical pathways represented as bar chart of the differentially expressed tear proteins of the soft CL users. The p-values of the proteins within the each canonical pathway was determined using the Benjamini-Hochberg corrected Fisher's exact test and ratio indicate the number of molecules in the dataset associated with a pathway to the total number of molecules identified in that particular pathway.
